# Supplementary material
Source: MDPI journal article supplement (https://www.mdpi.com/1999-4907/12/12/1624)
Supplement: s1 [file s1]

**Table S1.** Primers used in this work for amplification of bacterial or fungal ribosomal DNA.

| Primer Name | Primer sequence (5' – 3')                                                     | Reference | Target region    |
|-------------|-------------------------------------------------------------------------------|-----------|------------------|
| ITSF        | GTCGTAACAAGGTAGCCGTA                                                          | [34]      | 16S-23S rDNA     |
| ITSReub     | GCCAAGGCATCCACC                                                               |           |                  |
| 2234C       | GTTTCCGTAGGTGAACCTD                                                           | [35]      | ITS1-5.8S-ITS2   |
| 3126T       | TTGTAAAACGACGGCCAGTATATGCTTAAGTTCAGCGGGT                                      |           |                  |
| ITS1F       | CTTGGTCATTTAGAGGAAGTAA                                                        | [40]      | ITS1-5.8S-ITS2   |
| ITS4        | TCCTCCGCTTATTGATATGC                                                          | [41]      |                  |
| ITS1F_GC    | CGCCCCGCCGCGCGCGGCGGGCGGGGCGGGGGCACGGGGG<br>G CTTGGTCATTTAGAG                 | [40]      | ITS1             |
| ITS2        | GCTGCGTTCTTCATCGATGC                                                          | [41]      |                  |
| NS1         | GTAGTCATATGCTTGTCTC                                                           | [43]      | 18S rDNA         |
| NS41        | CCCGTGTGAGTCAAATTA                                                            |           |                  |
| AM1         | GTTTCCCGTAAGGCGCCGAA                                                          | [45]      | V3-V4 (18S rDNA) |
| NS31_GC     | CGCCCCGCCGCGCGCGGCGGGCGGGGCGGGGGCACGGGGG<br>G CACGGGGGGGTTGGAGGGCAAGTCTGGTGCC | [46]      |                  |
| ITS3        | GCATCGATGAAGAACGCAGC                                                          | [41]      | ITS2             |
| ITS4        | TCCTCCGCTTATTGATATGC                                                          |           |                  |

**Table S2.** Soil characteristics of the study areas. NAT = Natural; NURS = Nursery.

| Study site | O.M. (%) | C (%) | N (%) | K <sub>2</sub> O (ppm) | P <sub>2</sub> O <sub>5</sub> (ppm) | C/N  | pH   |
|------------|----------|-------|-------|------------------------|-------------------------------------|------|------|
| NAT1       | 0.42     | 0.25  | 0.07  | 0.0                    | 4.9                                 | 3.52 | 7.50 |
| NAT2       | 0.16     | 0.09  | 0.03  | 0.0                    | 3.3                                 | 3.16 | 7.45 |
| NURS1      | 4.31     | 2.50  | 0.29  | 319.0                  | 41.1                                | 8.72 | 7.61 |
| NURS2      | 4.58     | 2.65  | 0.33  | 332.0                  | 41.0                                | 8.04 | 7.64 |
| NURS3      | 3.69     | 2.14  | 0.30  | 350.0                  | 48.7                                | 7.14 | 7.67 |
